# Integración ambiental de nuevo cauce mediante técnicas de bioingeniería para minimizar los efectos de las avenidas en Villaviciosa, Asturias (España)

## *Environmental integration of a new riverbed using bioengineering techniques to minimise the effects of flooding in Villaviciosa, Asturias (Spain)*

Esther Barroso-Cuevas<sup>a1</sup>, Víctor Manuel Fernández-Pacheco<sup>a2</sup> y Rodolfo Espina-Valdés<sup>a3\*</sup>

<sup>a</sup> Área de Ingeniería Hidráulica, Departamento de Energía, Escuela Politécnica de Mieres. Universidad de Oviedo C/ Gonzalo Gutiérrez Quirós s/n. 33600-Mieres, Asturias (España).

E-mail: <sup>a1</sup>uo65101@uniovi.es, <sup>a2</sup>fernandezpvictor@uniovi.es, <sup>a3\*</sup>espinarodolfo@uniovi.es

\*Autor para correspondencia

Recibido: 02/07/2023

Aceptado: 28/12/2023

Publicado: 31/01/2024

**Citar como:** Barroso-Cuevas, E., Fernández-Pacheco, V.M., Espina-Valdés, R. 2024. Environmental integration of a new riverbed using bioengineering techniques to minimise the effects of flooding in Villaviciosa, Asturias (Spain). *Ingeniería del agua*, 28(1), 17-31. <https://doi.org/10.4995/ia.2024.19988>

## RESUMEN

A la hora de analizar la problemática de inundaciones que padece el municipio de Villaviciosa en Asturias, se persigue una solución alternativa que abarque el concepto de la gestión de los ecosistemas. Para ello se diseña la ejecución de un cauce receptor que intercepte y evacue las aguas superficiales reduciendo la cuenca vertiente y lograr una solución sostenible al problema de inundabilidad, mediante la derivación de los arroyos con el fin de reducir la carga de saneamiento y mejorar el rendimiento de la Estación Depuradora de Aguas Residuales (EDAR). De la misma manera, para conseguir minimizar cualquier tipo de impacto ambiental, se planea una actuación de integración de la obra hidráulica mediante técnicas de bioingeniería en las zonas afectadas, cuya principal función será la de regenerar aquellos espacios modificados con especies propias del lugar a la vez que se constituye todo el sistema de drenaje. Además, se prevé la creación de una llanura de inundación para la transferencia diferida de los caudales de posibles avenidas aguas abajo de la intercepción de los cauces. Con todo ello, se logra reducir el impacto de las avenidas en el núcleo urbano, la integración medioambiental de la zona de actuación y contribuir a optimizar el funcionamiento de la EDAR.

**Palabras clave** | avenidas; bioingeniería; sostenibilidad; laminación natural.

## ABSTRACT

*When analysing the flooding problem suffered by the municipality of Villaviciosa in Asturias, an alternative solution is sought that encompasses the concept of ecosystem management. To this end, a receiving channel is designed to intercept and evacuate surface water, reducing the catchment basin and achieving a sustainable solution to the flooding problem by diverting the streams in order to reduce the sewage load and improve the performance of the Waste Water Treatment Plant (WWTP). In the same way, in order to minimise any type of environmental impact, it is planned to integrate the hydraulic work by means of bioengineering techniques in the affected areas, the main function of which will be to regenerate the modified spaces with species native to the area, while at the same time creating the entire drainage system. In addition, a flood plain will be created for the deferred transfer of possible flood flows downstream of the interception of the watercourses. All this will reduce the impact of floods on the urban centre, the environmental integration of the area of action and contribute to optimising the operation of the WWTP.*

**Key words** | flooding; bioengineering; sustainability; natural abatement.

## INTRODUCCIÓN

Los riesgos naturales como la erosión del suelo, las inundaciones torrenciales y los corrimientos de tierras son fenómenos que tienen graves consecuencias a escala mundial (Smith y Katz, 2013). La influencia del cambio climático en la variación de la frecuencia y magnitud de las inundaciones resulta cuestión de estudio para la comunidad científica (Benito *et al.*, 2022). De esta forma, el régimen de precipitaciones del Principado de Asturias ha registrado una variación significativa desde principios de siglo (Mora-García *et al.*, 2019; Romero-Fresneda *et al.*, 2020). Durante los últimos años hidrológicos, aun sin grandes variaciones en la cantidad neta de precipitación anual, se ha reducido el número de días en los que se registran precipitaciones (Gómez, 2021). Esto supone un incremento en los episodios de inundabilidad en los cauces asturianos (Maestre y Prieto, 2020) y las consecuencias que derivan de ellos.

Las avenidas producidas en el río Linares, en Asturias, junto a los aportes de aguas superficiales de escorrentía de ciertos arroyos que vierten sus aguas por la margen derecha a la ría de Villaviciosa colapsando la red de drenaje urbana producen inundaciones frecuentes en el núcleo urbano de Villaviciosa (Figura 1). Dicha problemática afecta al comportamiento hidráulico y sistema de evacuación de pluviales de la población en épocas de crecida, la cual se ve acrecentada por la proximidad de la ría y la influencia de la marea.

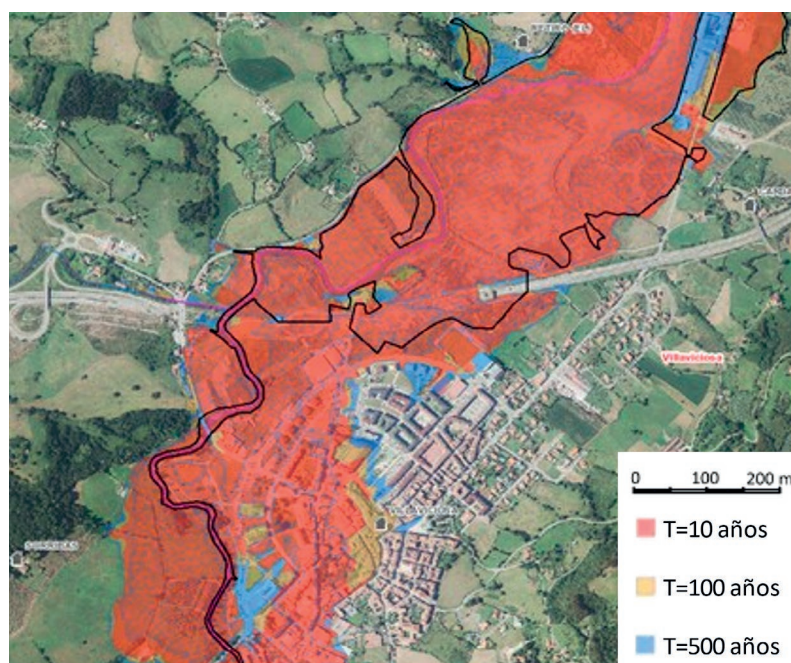

**Figura 1** | Inundación para distintos períodos de retorno del municipio de Villaviciosa, ARPSIs ES018-AST-43-1 y ES018-AST-43-2.

Para dar solución a esta creciente problemática, se decidió analizar el empleo de técnicas de bioingeniería, como alternativa a la ingeniería convencional (Li y Eddleman, 2002; Caspele *et al.*, 2018), con el fin de anular el impacto tanto en el medio ambiente como en el paisaje. La normativa de la UE exige soluciones de ingeniería basadas en la naturaleza (Hablamos Europa, 2023), como las técnicas de bioingeniería de suelos y aguas o Soil and Water Bioengineering (SWBE). A diferencia de las estructuras de ingeniería civil “duras” convencionales, la idea de las estructuras SWBE es el uso de componentes biológicos en la estructura de ingeniería para tener en cuenta no sólo una función técnica, sino también valores ecológicos y estéticos (Rauch *et al.*, 2022). Este tipo de técnicas son habituales a la hora de minimizar también la erosión de las riberas y dar forma a los cauces (Anstead *et al.*, 2012). Además, son una herramienta válida para la restauración de la integridad ecológica de los ecosistemas ribereños y los humedales (De Santoli *et al.*, 2008). Las obras de bioingeniería del suelo en las cabeceras de cuenca permiten mejorar los efectos de interceptación y la capacidad de infiltración-retención del suelo. La realización de trabajos de control de la erosión y de los torrentes en la cuenca podría ser la manera de disminuir en parte los riesgos naturales y controlar seriamente los riesgos

provocados por el hombre (Ristic y Malosevic, 1997). De la necesaria concienciación ambiental deriva el desarrollo de sistemas de bioingeniería, estructuras interconectadas, que desempeñen eficazmente funciones de ingeniería y biológicas de protección de territorios y restauración de terrenos alterados (Rey *et al.*, 2019; Kurbanov *et al.*, 2021).

## Objetivos del análisis

El objeto de este estudio es definir la solución para aliviar los problemas de drenaje como consecuencia de la aportación de caudales al entorno de la población de Villaviciosa por los arroyos orientales de pequeña entidad a su paso por dicho término municipal. Dicha problemática afecta al comportamiento hidráulico y sistema de evacuación de pluviales de la población en épocas de crecida, la cual se ve acrecentada por la proximidad de la ría de Villaviciosa.

Se pretende solucionar esta problemática mediante el diseño de una solución basada en el campo de la bioingeniería en cauces, y cuya consecución mejora los riesgos de inundabilidad, además de realizar una integración ambiental del entorno de Villaviciosa mejorando el comportamiento hidráulico y sistema de evacuación de pluviales de la población. La intercepción y evacuación de estas aguas superficiales pretende aliviar el problema de drenaje de un modo sostenible, mediante la derivación de los arroyos con el fin de reducir la carga de saneamiento, mejorar el rendimiento de la Estación Depuradora de Aguas Residuales (EDAR) existente y los caudales de los vertidos.

Las actuaciones a realizar en el presente estudio se distribuirán en dos apartados:

- Ejecución de un cauce naturalizado de captación del caudal de los arroyos interceptados, con una longitud estimada de 2.231 m, iniciando su trazado en la AS-332 hasta las proximidades de la A-8, para canalizar el drenaje por los conductos existentes que circulan bajo esta autovía hacia la ría de Villaviciosa mediante alivijs a los cauces y/o a los conductos actuales.
- Medidas para la integración ambiental del área de actuación, así como medidas correctoras y compensatorias sobre el medio afectado por las obras.

## Normativa de aplicación

Finalizada la revisión y actualización de los mapas de peligrosidad y riesgo de inundación, la Confederación Hidrográfica del Cantábrico (CHC), la Agencia Vasca del Agua (URA), coordinadamente con las autoridades de Protección Civil y el resto de administraciones competentes, han redactado la propuesta de proyecto de los Planes de Gestión del Riesgo de Inundación de la Demarcación Hidrográfica del Cantábrico Occidental y de la parte española de la Demarcación Hidrográfica del Cantábrico Oriental (CHC occidental, 2023; CHC oriental, 2023a).

Los Planes de Gestión del Riesgo de Inundación (PGRI) buscan lograr una actuación coordinada de todas las administraciones públicas y la sociedad para reducir las consecuencias negativas de las inundaciones.

Los Planes Generales de Riesgos de Inundación (PGRIs) fijan las medidas que cada una de las administraciones debe aplicar en el ámbito de sus competencias para alcanzar los objetivos previstos.

Ejemplos de medidas son la ordenación territorial y urbanística, los planes de protección civil, la mejora de los sistemas de medida y alerta hidrológica, la restauración fluvial, las obras de defensa en zonas habitadas o las obras de emergencia para la reparación de infraestructuras que hayan sido dañadas tras una avenida.

Por Real Decreto Real Decreto 26/2023, de 17 de enero (CHC oriental, 2023b), se aprobó la revisión y actualización de los planes de gestión del riesgo de inundación de las demarcaciones hidrográficas del Cantábrico Occidental, Guadalquivir, Segura, Júcar y de la parte española de las demarcaciones hidrográficas del Miño-Sil, Duero, Tajo, Guadiana, Ebro, Ceuta y Melilla.

Dicha cuestión queda reflejada en documentos como el PGRI de la Demarcación Hidrográfica Occidental, y muy particularmente en su Anejo nº 2 (CHC, 2016a). Descripción del programa de medidas, se relacionan una serie de medidas, a saber:



- Medidas de prevención de inundaciones.
- Medidas de protección frente a inundaciones.
- Medidas de preparación ante inundaciones.
- Medidas de recuperación y revisión tras inundaciones.

En el marco de las medidas de protección frente a inundaciones, figuran entre otras las medidas 14.03.02 denominada “Medidas estructurales (encauzamientos, motas, diques, etc.) que implican intervenciones físicas en los cauces, aguas costeras y áreas propensas a inundaciones”.

El objetivo de la implementación de este tipo de medidas es conseguir una reducción, en la medida de lo posible, del riesgo a través de la disminución de la peligrosidad para la salud humana, las actividades económicas, el patrimonio cultural y el medio ambiente en las zonas inundables. En el mapa de calados con probabilidad de inundación se puede observar la inundación que se daría en la zona urbana de Villaviciosa para un caso excepcional (Figura 2). Las Áreas de Riesgos Potencial Significativo de Inundación (ARPSIs) identificadas en Villaviciosa (ES018-AST-43-1 y ES018-AST-43-2) por la problemática de inundaciones y afecciones ocurridas de forma recurrente son objeto en el Plan de Gestión de Riesgo de Inundación (PGRI) donde se puede observar la existencia de medidas estructurales planificadas para el núcleo urbano de Villaviciosa para el periodo 2015-2021 (CHC, 2016a). Además, en el Anejo 3 de Justificación de las Medidas Estructural del Plan de Gestión (CHC, 2016b) se incorporan unas propuestas de posibles medidas estructurales entre las que figuran: obras de defensa en el río Linares, Reconstrucción y reparación de la escollera en Colominas, Actuaciones en el puente de la AS-267, Construcción de defensa en el parque fluvial “La Barquerina”, Mejora de la capacidad hidráulica del puente “Huetes”, Defensas en la zona norte del núcleo urbano y el objeto de este estudio, Intercepción y evacuación de aguas fluviales y de escorrentías.

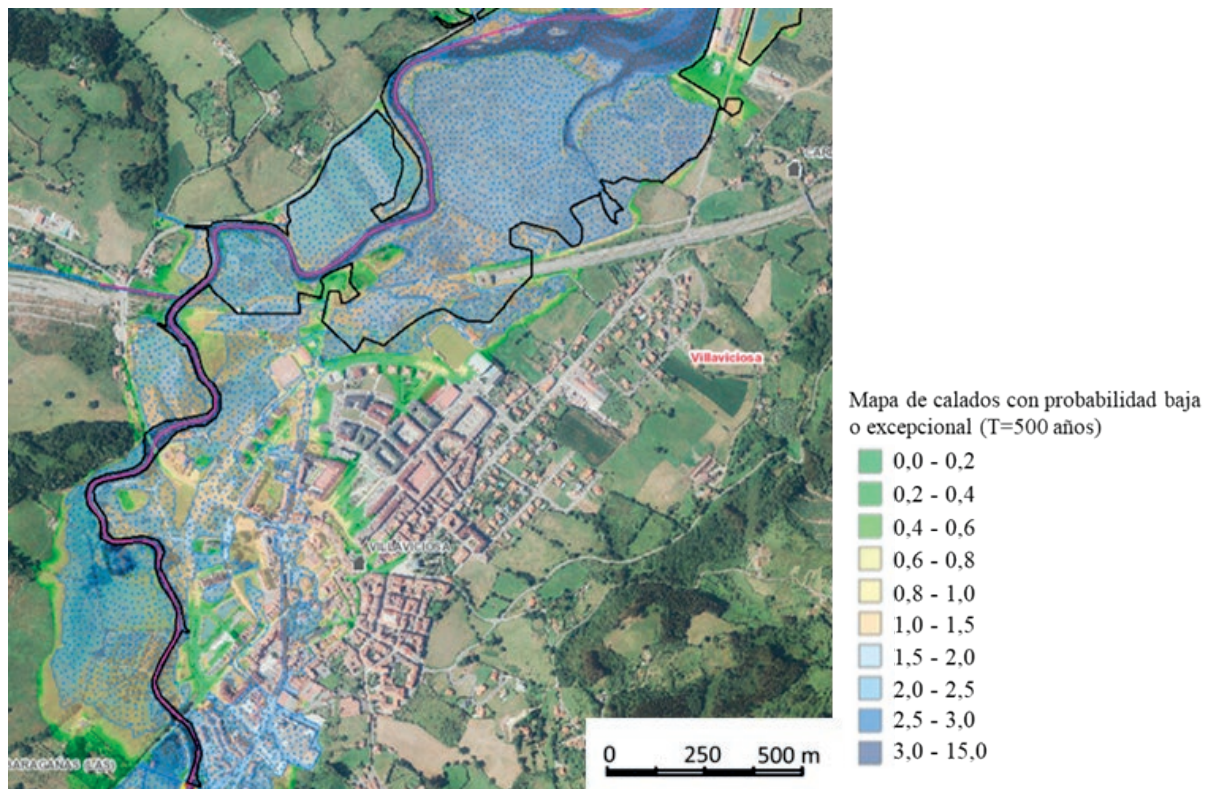

**Figura 2 |** Mapa de calados para inundabilidad con período de retorno de 500 años, municipio de Villaviciosa.

Este estudio analiza la creación de un nuevo cauce receptor con medidas de bioingeniería que favorezca reducir la cuenca vertiente a través del municipio de Villaviciosa de los afluentes de la margen derecha de la Ría e integrar en el paisaje las obras de drenaje necesarias para resolver el problema. Se podría enmarcar entre las medidas de actuación del PGRI, contribuyendo a interceptar y evacuar las aguas superficiales de escorrentía de ciertos arroyos orientales. Además, se prevé la creación de una llanura de inundación para la transferencia diferida de los caudales de posibles avenidas aguas abajo de la intercepción de los cauces.

## MATERIALES Y METODOLOGÍA

### Zona de análisis

El estudio se localiza íntegramente en el término municipal de Villaviciosa (Asturias) (Figura 3). El caudal de aportación al municipio de Villaviciosa en su vertiente sureste procede de las zonas de Lavandero, Montoto y San Vicente entre otros, y origina problemas de inundaciones en el entorno próximo a la localidad. Este hecho se acrecienta como consecuencia de la cercanía de la población a la ría de Villaviciosa y que en épocas de crecida condiciona la evacuación del caudal de estas cuencas de aportación por los cauces normales.

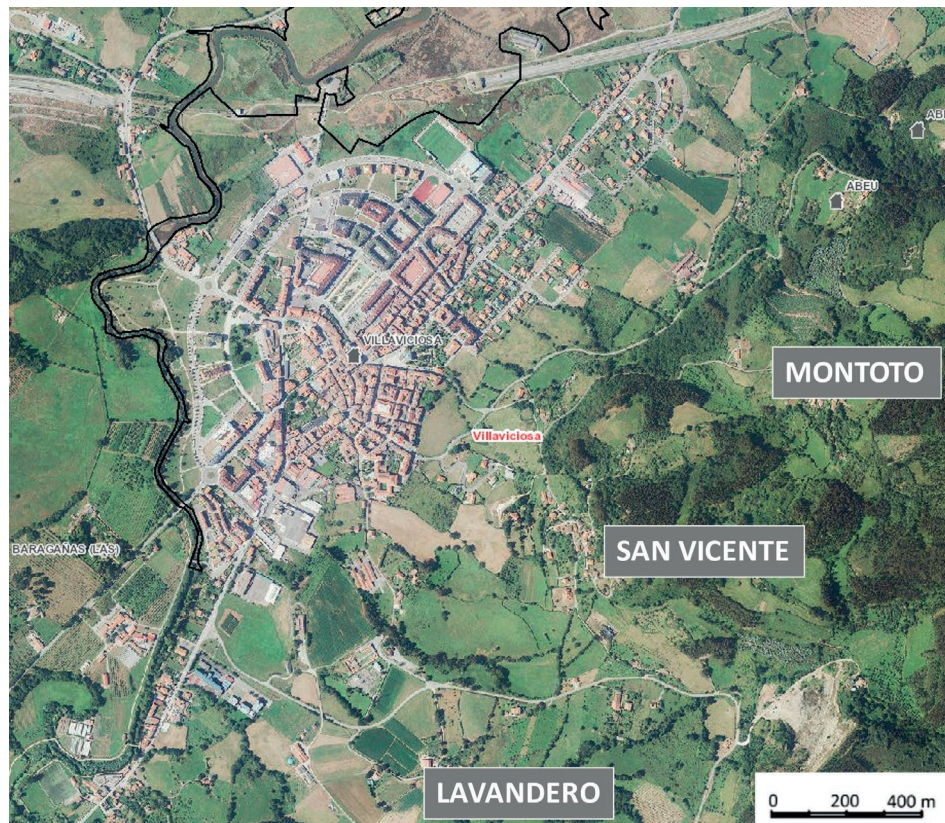

Figura 3 | Zona de análisis.

### Estudio de las cuencas de aportación

Una vez analizada la orografía y cartografía del terreno, las distintas cuencas de aportación de caudales al entorno de Villaviciosa en el área de estudio son las que se reflejan en la Figura 4. Estas cuencas serán las que se verán interrumpidas en su flujo hacia Villaviciosa por el futuro cauce receptor, paliando así los problemas de drenaje.



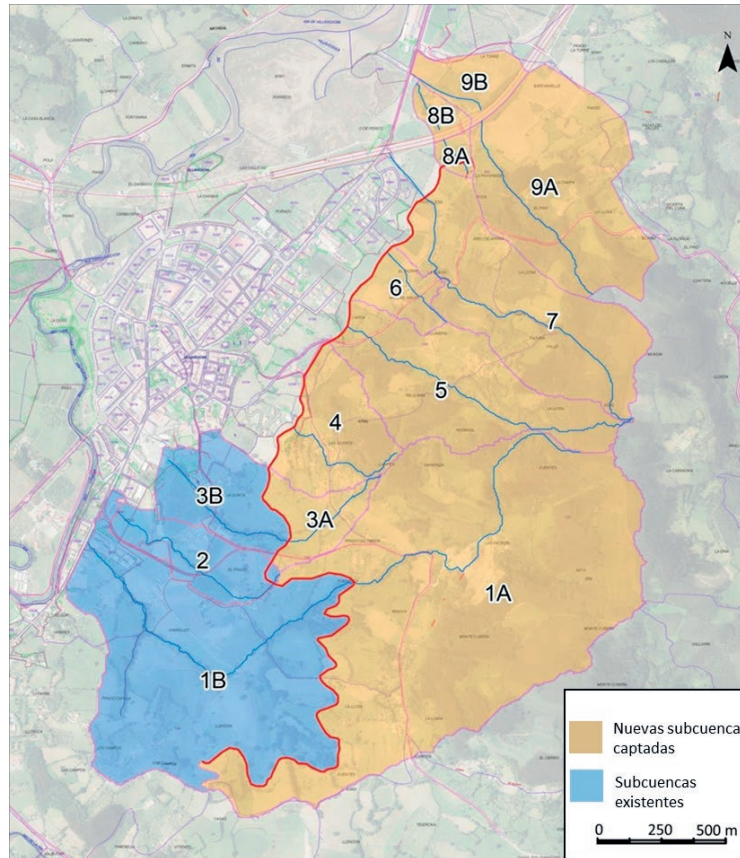

**Figura 4** | Cuencas de aportación al entorno de la población.

## Metodología para la estimación de caudales

Para las cuencas pequeñas interceptadas en el ámbito del estudio, se ha empleado el método racional, mientras que los caudales del cauce receptor se han obtenido de los documentos asociados a los Mapas de Peligrosidad y Riesgo de inundación del primero ciclo de la Directiva de Inundaciones de la Demarcación Hidrográfica del Cantábrico Occidental (CHC, 2023). Los caudales resultantes se basan en las Gráficas Del Plan Hidrológico Del Norte III (MMA, 1998) y en el Método Racional (Témez, 1992). En este estudio de alternativas, se han determinado los caudales de avenida para los periodos de retorno de 100 y 500 años.

El primer método utilizado es la obtención del caudal específico con la gráfica G.N.1 – “Caudales específicos de avenidas en función de la cuenca afluyente y del periodo de retorno T”, incluido en el Plan Hidrológico Norte III aprobado por Real Decreto 35/2023, según lo establecido en el Apéndice 9 “Criterios técnicos para la elaboración de estudios hidráulicos”, apartado 5.3 del Anexo II en el que se relaciona la superficie afluyente en km<sup>2</sup> con el caudal específico en m<sup>3</sup>/s km<sup>2</sup> para cada uno de los periodos de retorno antes mencionados (MITECO, 2023).

La metodología de cálculo por el Método Racional permite obtener el caudal punta a partir del coeficiente de escorrentía C, la máxima intensidad media I durante el periodo de cálculo correspondiente al tiempo de concentración  $t_c$ , la superficie de la cuenca A y el coeficiente de uniformidad en la distribución temporal de la precipitación con la expresión:

$$Q = \frac{C \cdot I \cdot A}{3,6} \cdot K_t \quad (1)$$

Los caudales obtenidos según las dos metodologías comentadas son las que se reflejan en la Tabla 1 para el método gráfico y en la Tabla 2 para el método racional que servirán de base para el estudio de las soluciones.

**Tabla 1** | Caudales de diseño para  $T_{100}$  y  $T_{500}$  mediante el método gráfico.

| Cuenca | Área (km <sup>2</sup> ) | T = 100 años                                            |                                 | T = 500 años                                            |                              |
|--------|-------------------------|---------------------------------------------------------|---------------------------------|---------------------------------------------------------|------------------------------|
|        |                         | Caudal específico<br>m <sup>3</sup> /s- km <sup>2</sup> | Caudal Q<br>(m <sup>3</sup> /s) | Caudal específico<br>m <sup>3</sup> /s- km <sup>2</sup> | Caudal Q (m <sup>3</sup> /s) |
| 9      | 0.57                    | 8.4                                                     | 4.75                            | 12                                                      | 6.78                         |
| 9a     | 0.48                    | 8.4                                                     | 4.06                            | 12                                                      | 5.81                         |
| 9b     | 0.08                    | 8.4                                                     | 0.68                            | 12                                                      | 0.98                         |
| 8      | 0.06                    | 8.4                                                     | 0.46                            | 12                                                      | 0.66                         |
| 8a     | 0.02                    | 8.4                                                     | 0.19                            | 12                                                      | 0.27                         |
| 8b     | 0.03                    | 8.4                                                     | 0.28                            | 12                                                      | 0.39                         |
| 7a     | 0.45                    | 8.4                                                     | 3.82                            | 12                                                      | 5.45                         |
| 7b     | 0.06                    | 8.4                                                     | 0.48                            | 12                                                      | 0.69                         |
| 7      | 0.53                    | 8.4                                                     | 4.45                            | 12                                                      | 6.36                         |
| 6      | 0.07                    | 8.4                                                     | 0.56                            | 12                                                      | 0.8                          |
| 5      | 0.38                    | 8.4                                                     | 3.2                             | 12                                                      | 4.57                         |
| 4      | 0.20                    | 8.4                                                     | 1.86                            | 12                                                      | 2.58                         |
| 3      | 0.28                    | 8.4                                                     | 2.33                            | 12                                                      | 3.32                         |
| 3a     | 0.19                    | 8.4                                                     | 1.63                            | 12                                                      | 2.33                         |
| 3b     | 0.08                    | 8.4                                                     | 0.7                             | 12                                                      | 1                            |
| 2      | 0.14                    | 8.4                                                     | 1.19                            | 12                                                      | 1.7                          |
| 1      | 2.26                    | 7.5                                                     | 16.93                           | 11                                                      | 24.84                        |
| 1a     | 1.34                    | 8                                                       | 10.74                           | 11.8                                                    | 15.85                        |
| 1b     | 0.91                    | 8.4                                                     | 7.69                            | 12                                                      | 10.98                        |
| 3a-8a  | 1.31                    | 8                                                       | 10.47                           | 11.8                                                    | 15.44                        |
| 1a-8a  | 2.66                    | 7.5                                                     | 19.98                           | 10.8                                                    | 28.77                        |
| 3a-4   | 0.40                    | 8.4                                                     | 3.35                            | 12                                                      | 4.79                         |

**Tabla 2** | Caudales de diseño para  $T_{100}$  y  $T_{500}$  mediante el método racional.

| Cuenca | Área (km <sup>2</sup> ) | T = 100 años                               |                                 | T = 500 años                               |                                 |
|--------|-------------------------|--------------------------------------------|---------------------------------|--------------------------------------------|---------------------------------|
|        |                         | Intensidad media precipitaciones<br>(mm/h) | Caudal Q<br>(m <sup>3</sup> /s) | Intensidad media precipitaciones<br>(mm/h) | Caudal Q<br>(m <sup>3</sup> /s) |
| 9      | 0.57                    | 73.37                                      | 4.75                            | 94.41                                      | 9.21                            |
| 9a     | 0.48                    | 82.61                                      | 4.06                            | 106.30                                     | 8.81                            |
| 9b     | 0.08                    | 67.71                                      | 0.68                            | 87.12                                      | 1.23                            |
| 8      | 0.06                    | 67.05                                      | 0.46                            | 86.27                                      | 0.83                            |
| 8a     | 0.02                    | 81.57                                      | 0.19                            | 104.96                                     | 0.40                            |
| 8b     | 0.03                    | 71.83                                      | 0.28                            | 92.43                                      | 0.52                            |
| 7a     | 0.45                    | 65.29                                      | 3.82                            | 84.01                                      | 6.64                            |
| 7b     | 0.06                    | 73.37                                      | 0.48                            | 94.41                                      | 0.93                            |
| 7      | 0.53                    | 61.55                                      | 4.45                            | 79.20                                      | 7.34                            |
| 6      | 0.07                    | 70.35                                      | 0.56                            | 90.52                                      | 1.04                            |
| 5      | 0.38                    | 68.31                                      | 3.2                             | 87.90                                      | 5.86                            |
| 4      | 0.20                    | 96.14                                      | 1.86                            | 123.71                                     | 4.39                            |
| 3      | 0.28                    | 71.06                                      | 2.33                            | 91.44                                      | 4.38                            |
| 3a     | 0.19                    | 87.40                                      | 1.63                            | 112.46                                     | 3.72                            |
| 3b     | 0.08                    | 62.59                                      | 0.7                             | 80.54                                      | 1.17                            |
| 2      | 0.14                    | 73.37                                      | 1.19                            | 94.41                                      | 2.31                            |
| 1      | 2.26                    | 43.80                                      | 16.93                           | 56.37                                      | 23.10                           |
| 1a     | 1.34                    | 63.55                                      | 10.74                           | 81.78                                      | 19.13                           |
| 1b     | 0.91                    | 53.46                                      | 7.69                            | 68.79                                      | 11.16                           |
| 3a-8a  | 1.31                    | 43.54                                      | 10.47                           | 56.03                                      | 13.50                           |
| 1a-8a  | 2.66                    | 30.10                                      | 19.98                           | 38.73                                      | 20.25                           |
| 3a-4   | 0.40                    | 58.36                                      | 3.35                            | 75.09                                      | 5.36                            |

## Modelo hidráulico

Con el objeto de analizar el funcionamiento hidráulico de las actuaciones previstas, tanto para los periodos de retorno estudiados, como para el análisis de los caudales de diseño  $Q_{10}$  y  $Q_{100}$ , se ha realizado un modelo hidráulico tanto de la situación actual, como de la situación futura. Se ha elegido un modelo bidimensional IBER (Bladé *et al.*, 2014), dadas las características geomorfológicas del tramo del río en estudio, de terrenos llanos y amplias vegas y condicionado por la marea, donde las hipótesis unidimensionales pierden validez, requiriendo un funcionamiento bidimensional que contemple la influencia de las componentes transversales del flujo. De este modo se observa la necesidad de utilizar un modelo bidimensional que aporte información acerca de flujos de vertido lateral y zonas de recirculación del fluido.

Aunque las actuaciones proyectadas no se ubican directamente sobre la Ría de Villaviciosa, a la hora de realizar los modelos hidráulicos es necesario incluir como “condición de contorno” el nivel de la Ría en cada punto de vertido.

Con el fin de analizar la efectividad de las medidas propuestas, es necesario diferenciar entre las avenidas generadas por los cauces objeto de actuación, de las generadas por la Ría de Villaviciosa. Por este motivo, dada la gran diferencia entre el área de las cuencas que intervienen, se han modelizado dos escenarios:

- Escenario de diseño: Se ha modelizado el caudal de 100 años de periodo de retorno ( $Q_{100}$ ) en el Arroyo las Fuentes y el caudal correspondiente a la máxima crecida ordinaria en la Ría de Villaviciosa ( $Q_{MCO} = 87 \text{ m}^3/\text{s}$ ).
- Escenario de verificación: Se ha modelizado la actuación para el caudal de 100 años de periodo de retorno ( $Q_{100}$ ) en el Arroyo las Fuentes y el caudal de 10 años de periodo de retorno (en la Ría de Villaviciosa ( $Q_{10} = 169 \text{ m}^3/\text{s}$ )).

En la situación actual se ha introducido el caudal generado de manera natural por las cuencas vertientes, así como las obras de drenaje existentes. La condición de contorno aguas abajo del modelo es la de calado normal y se ha introducido el nivel de la marea (2.54 m). Se ha considerado la Ría de Villaviciosa en régimen permanente, con un caudal equivalente a la punta de la máxima crecida ordinaria. Se ha modelizado el arroyo con caudal de 100 años de periodo de retorno ( $Q_{100}$ ) y el cauce receptor con el caudal correspondiente a la máxima crecida ordinaria.

En la Figura 5 se muestra la situación actual en el punto de vertido norte. Se ha introducido el caudal generado de manera natural por las cuencas vertientes, así como las obras de drenaje existentes. Se ha considerado la marea en su punto más alto, tal y

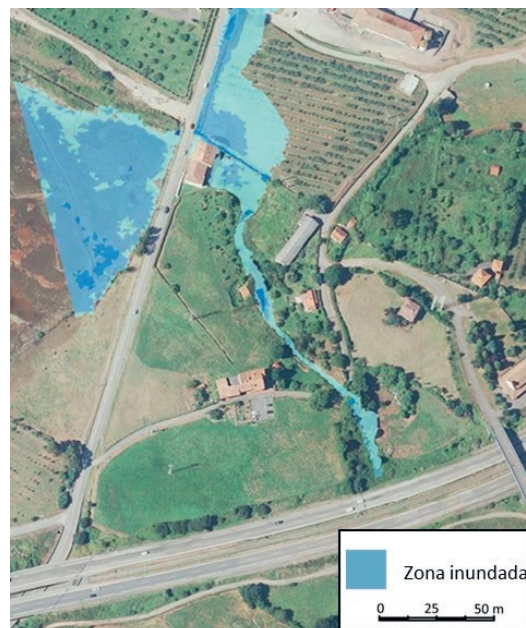

**Figura 5** | Situación actual en el vertido norte para un periodo de retorno de 100 años ( $Q_{100}$ ).



como se indica en el apartado anterior, además se ha modelizado el arroyo con caudal de 100 años de periodo de retorno ( $Q_{100}$ ) y el cauce receptor con el caudal correspondiente a la máxima crecida ordinaria. Se observa que dada la poca capacidad hidráulica de la ODT situada bajo la nacional, para el caudal generado por la tormenta de 100 años de periodo de retorno, se inundan los terrenos circundantes a esta. Esta situación se ve agravada al encontrarse los terrenos más cercanos a la desembocadura afectados directamente por la marea.

## DISEÑO DE LA SOLUCIÓN PROPUESTA

Las actuaciones a realizar en el presente estudio se pueden dividir en dos grandes líneas:

- Diseño de un cauce naturalizado de captación del caudal de los arroyos interceptados por el mismo, con una longitud estimada de 2224 m, iniciando su trazado en la AS-332 hasta las proximidades de la A-8, para canalizar el drenaje por los conductos existentes que circulan bajo esta autovía hacia la ría de Villaviciosa mediante aliviós a los cauces y/o a los conductos actuales. Además, en la prolongación al cauce de nueva ejecución, con objeto de laminar las avenidas en periodos de pleamar, se ha proyectado una cuenca de infiltración capaz de albergar 17 000 m<sup>3</sup>, drenándose en la bajamar a través de la ODT de 800 mm de diámetro existente en la N- 632.
- Medidas para la integración ambiental del área de actuación, así como medidas correctoras y compensatorias sobre el medio afectado por las obras.

### Cauce de recepción

Una vez analizados los caudales, y las posibilidades del trazado para no invadir las fincas urbanas salvo las estrictamente necesarias y requerimientos técnicos, se ha realizado una tramificación pormenorizada con objeto de optimizar la solución adoptada (Figura 6 y Tabla 3). El cauce receptor naturalizado general cuya longitud aproximada es de 2224 m, discurre a lo largo de su trazado con una sección en cauce trapezoidal, sección que se ve interrumpida a la altura del p.k. 0+913 donde, por necesidades del cruce con el camino del depósito y de la AS-330, la sección pasa a ser tipo marco de hormigón armado enterrado.

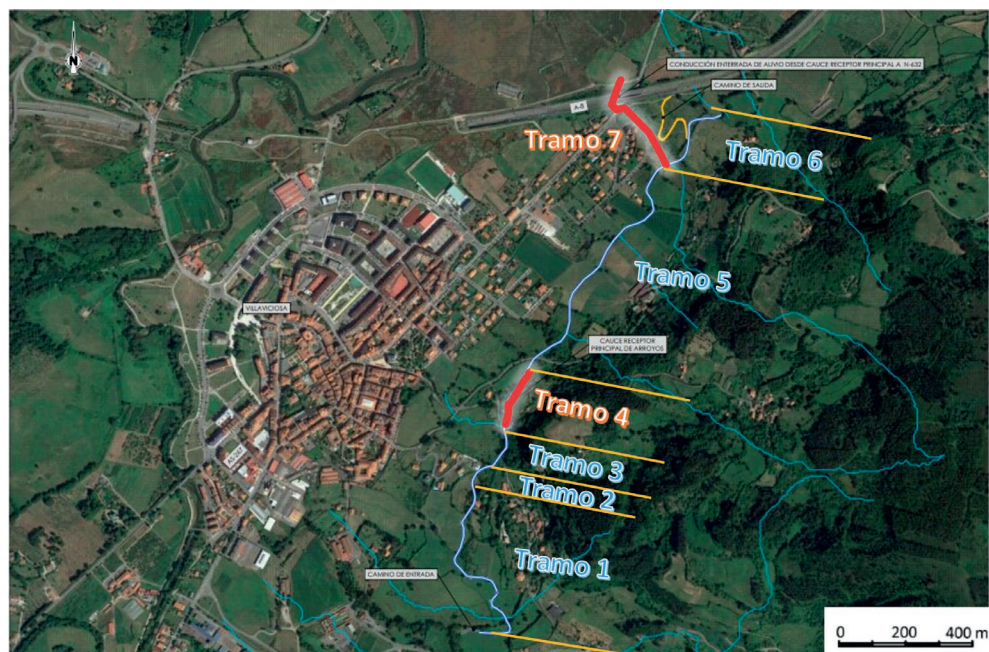

Figura 6 | Tramificación del cauce.

**Tabla 3** | Tramificación de cauce.

| Tramo   | P.K. Inicial | P.K. Final | Sección Tipo         |
|---------|--------------|------------|----------------------|
| Tramo 1 | 0+000        | 0+745      | Cauce 1.5 m × 1.0 m  |
| Tramo 2 | 0+745        | 0+781      | Cauce 2.0 m × 1.0 m  |
| Tramo 3 | 0+781        | 0+913      | Cauce 1.5 m × 1.0 m  |
| Tramo 4 | 0+913        | 1+208      | Marcos 2.0 m × 2.0 m |
| Tramo 5 | 1+208        | 1+975      | Cauce 2.6 m × 1.6 m  |
| Tramo 6 | 1+975        | 2+224      | Cauce 5.0 m × 0.7 m  |
| Tramo 7 | 1+958        | N-632      | Conducción 1800 mm   |

El tramo 1 da inicio al cauce receptor general (Figura 7) y se deberá realizar una transición para conectar el contorno protegido con escollera en el cauce hasta la cota del terreno existente para generar la posibilidad de acceder al mismo para su mantenimiento. La base del tramo de transición se realizará con los mismos criterios que el recubrimiento del propio cauce receptor (escollera en la base y protección del mismo con lámina impermeabilizante, geotextil, ...). En este primer tramo, se encuentra el cruce el primer arroyo y que será un punto de aportación de caudal al cauce receptor de un modo más significativo al resto de la cuenca interceptada. Para minimizar el impacto y amortiguar la entrada del caudal al cauce receptor, se ha proyectado en la zona de encuentro unas barreras de disipación de energía mediante bloques de escollera y de un cuenco amortiguador.

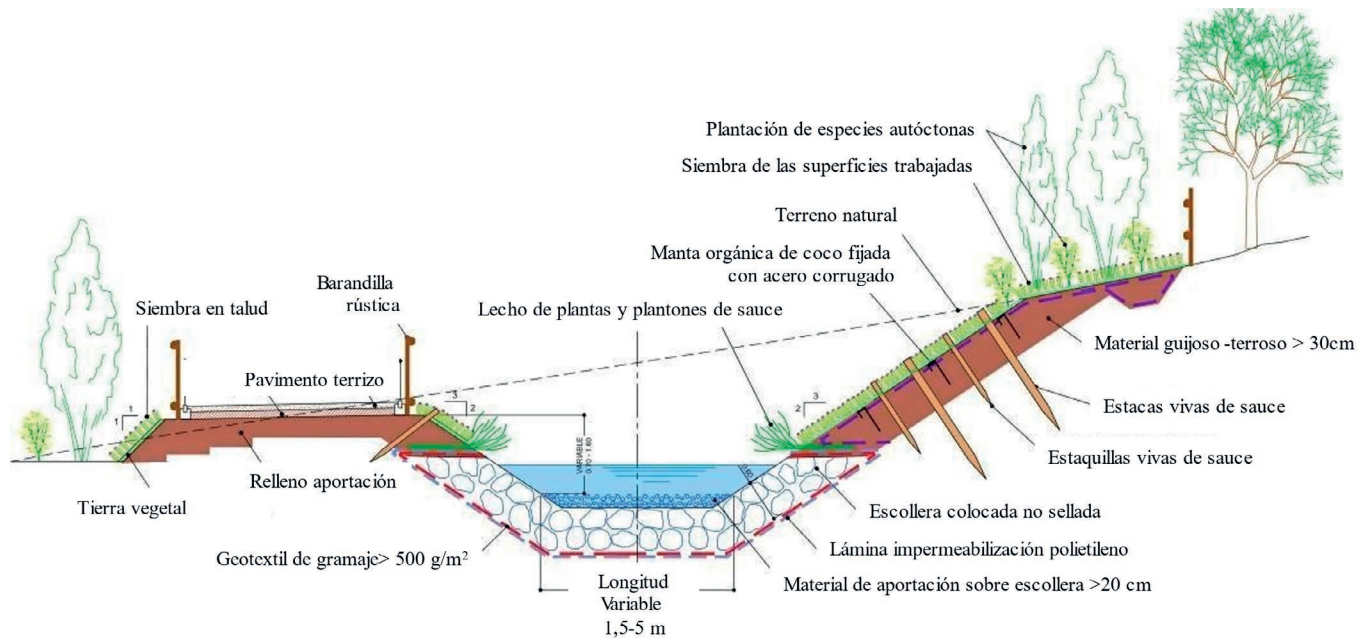**Figura 7** | Sección tipo del cauce receptor general.

El tramo 2 es una continuación del anterior con un cambio de sección debido a unas sobreelevaciones de la lámina de agua. El tramo 3 recupera la sección inicial hasta el entronque con el tramo 4, cuya sección se conforma con un marco enterrado (Figura 8) de hormigón armado condicionado por la existencia de edificaciones próximas.

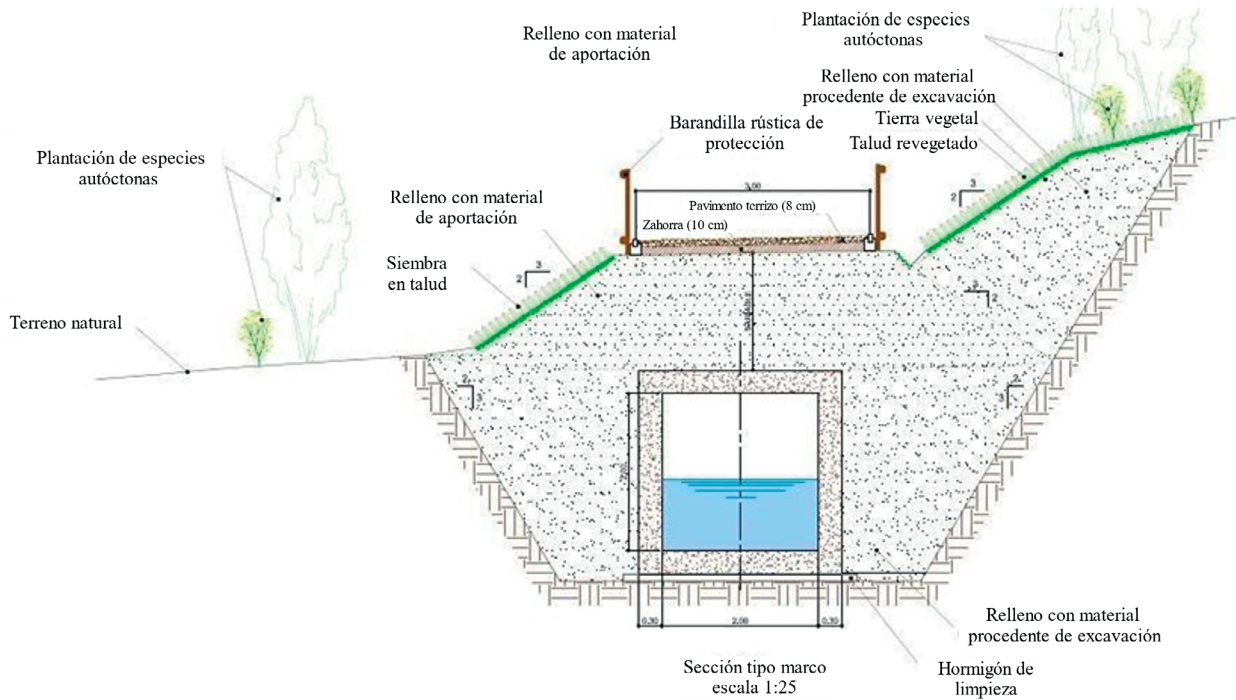

Figura 8 | Sección tipo de cauce entubado prefabricado.

El tramo 5 devuelve el río a zona rústica sin condicionante alguno más que su propio trazado y deriva las aguas de hasta un período de retorno de 5 años a través de un marco que evacúa al conducto de 1200 mm ubicado bajo la N-632 y la A-8. También se disponen puntos de aportación de caudal al cauce receptor de un modo más significativo al resto de la cuenca interceptada. Del mismo modo, para minimizar el impacto y amortiguar la entrada del caudal, se ha diseñado en la zona de encuentro unas barreras de disipación de energía mediante bloques de escollera y de un cuenco amortiguador (Figura 9).

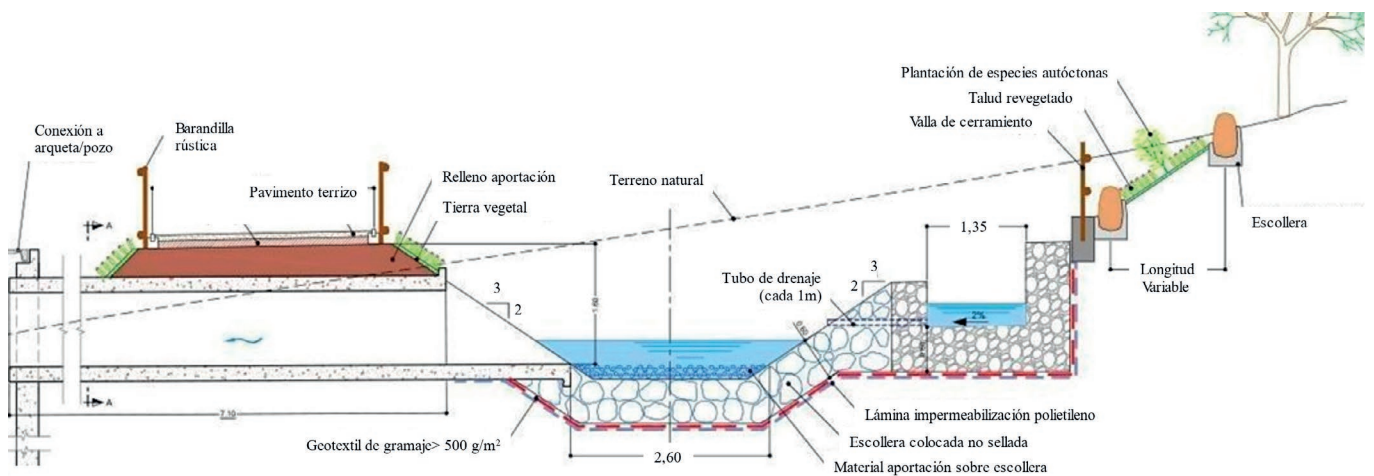

Figura 9 | Sección tipo de cauce entubado prefabricado.



El tramo 6 es el recorrido final del cauce receptor y conducirá el caudal excedente del relativo al periodo de retorno de los 5 años hasta el periodo de retorno de 100 años. Este tramo discurre por suelo rústico con una sección de 5 m de base  $\times$  0.7 m de altura, sección más abierta con objeto de laminar la avenida a través de la cuenca del arroyo Las Callejas. Este tramo por tanto sólo recibirá caudal en ocasiones puntuales (caudales no ordinarios). El caudal máximo estimado con el periodo de retorno de los 100 años que recibiría este tramo del cauce es de unos 5 m<sup>3</sup>/s. A continuación, el tramo 7 estará formado por conductos de 1.800 mm con pendientes medias del 3%, para cumplir con las velocidades máximas recogidas en la IC 5.2 de Drenaje Superficial (MOPU, 2016) y que el conducto de 1.200 mm bajo la N-632 no trabaje en carga. Por último, en la prolongación al cauce de nueva ejecución, con objeto de laminar las avenidas en periodos de pleamar, se ha proyectado una cuenca de infiltración (Figura 10) capaz de albergar 17000 m<sup>3</sup>, drenándose en la bajamar a través de la ODT de 800 mm de diámetro existente en la N- 632.

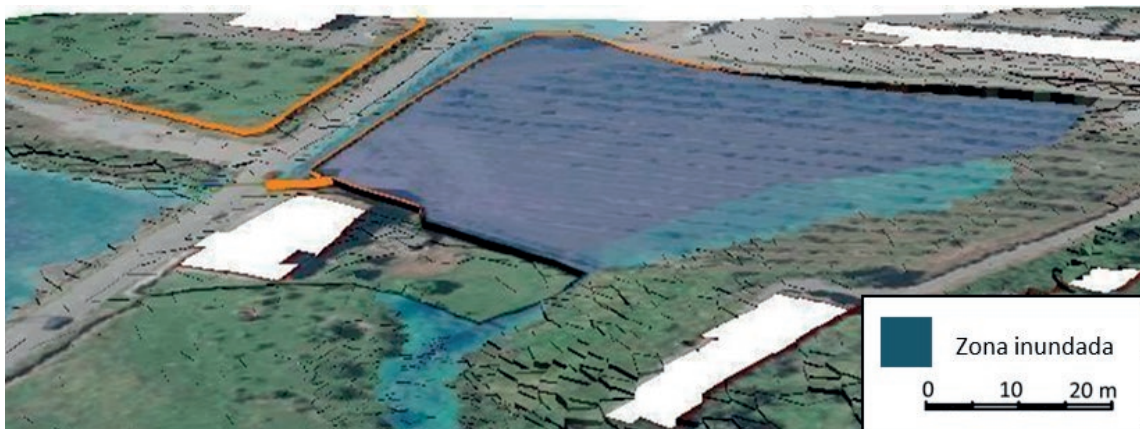

Figura 10 | Cuenca de infiltración para laminación de avenidas en pleamar.

## Integración de la obra con bioingeniería

Las actuaciones derivadas de la integración ambiental de la obra con bioingeniería contemplan la hidrosiembra de todos los taludes generados en el proyecto para garantizar la emergencia de la primera cubierta vegetal. Para ello, se diseña una hidrosiembra con una mezcla de semillas compuesta por gramíneas (de acción radical profunda), leguminosas (de acción radical superficial y con capacidad de enriquecimiento del terreno con nitrógeno) y un 2% de leñosas, con una dosis de 10-30 g/m<sup>2</sup>. A continuación se planea el extendido de la manta orgánica de coco se realizará una vez extendida la tierra vegetal en los taludes generados por el cauce receptor. La pendiente de los taludes diseñados (3:2) justifica la mayor idoneidad de las mantas orgánicas frente las mallas. Para reforzar la estabilidad del talud se plantea la implantación de estacas y estaquillas de sauce, especie de fácil propagación vegetativa. El material vegetal a utilizar será de diferentes dimensiones y con diferentes marcos de plantación para garantizar la cubierta del talud, tanto en superficie como en profundidad, a través de su desarrollo radicular. Con el objetivo de evitar los procesos erosivos en el talud, además del estaquillado descrito, se incluye el extendido en la base de los taludes del cauce receptor un lecho de plantas y plantones de sauce de 1-3 cm de diámetro. Además, para mejorar la integración paisajística de toda la solución prevista, se contempla la plantación de las diferentes especies: alisedas oceánicas mesotrofas, alisedas oceánicas oligotrofas, saucedas negras oceánicas atlánticas, avellanadas y saucedas blancas.

Dentro de las actuaciones de este estudio se incluye la integración ambiental de la estructura longitudinal y transversal de la solución propuesta. Se destaca la instalación en un pequeño tramo de 11 barreras vegetales filtrantes cada 5 m que ayuden a la retención de caudales líquidos y sólidos en el cauce, favoreciendo así la sucesión ecológica de la vegetación de ribera. Esta sucesión se incentivará con la eliminación de especies alóctonas e invasoras y con la plantación de especies autóctonas según la selección de especies.

## CONCLUSIONES

Las avenidas producidas en el río Linares, unidas a los aportes de aguas superficiales de escorrentía de ciertos arroyos que vierten sus aguas por la margen derecha a la ría de Villaviciosa colapsando la red de drenaje urbana, unido a las subidas de la marea, producen inundaciones frecuentes en el núcleo urbano de Villaviciosa, en Asturias.

La intercepción y evacuación de estas aguas superficiales pretende dar solución al problema de drenaje de un modo sostenible, mediante la derivación de los arroyos con el fin de reducir la carga de saneamiento, mejorar el rendimiento de la EDAR y los caudales de los vertidos. El objeto final perseguido con el siguiente estudio es el definir la solución para aliviar los problemas de drenaje como consecuencia de la aportación de caudales al entorno de la población de Villaviciosa por los arroyos orientales (Pedregal, Cuartel, Alosei y Manzana principalmente) a su paso por dicho término municipal. Dicha problemática afecta al comportamiento hidráulico y sistema de evacuación de pluviales de la población en épocas de crecida, la cual se ve acrecentada por la proximidad de la ría de Villaviciosa.

Las soluciones previstas se pueden dividir en dos grandes bloques:

- Ejecución de un cauce receptor de captación del caudal de los arroyos interceptados por el mismo, con una longitud estimada de 2224 m para canalizar el drenaje por los conductos existentes que circulan bajo la autovía A-8 hacia la ría de Villaviciosa mediante alivios a los cauces y/o a los conductos actuales. Además, en la prolongación al cauce de nueva ejecución, con objeto de laminar las avenidas en periodos de pleamar, se ha proyectado una cuenca de infiltración capaz de albergar 17000 m<sup>3</sup>, drenándose en la bajamar a través de la ODT de 800 mm de diámetro existente en la N-632.
- Medidas para la integración del área de actuación, así como medidas correctoras y compensatorias sobre el medio afectado por las obras.

Esta solución sostenible permitirá minimizar los efectos de la inundación cuando a la avenida propia del río Linares se le suma la pleamar y su consiguiente descenso en la capacidad de alivio. Además, reduce la carga de saneamiento y permite mejorar el rendimiento de la EDAR.

Para trabajos futuros, a partir de los caudales obtenidos en el estudio hidráulico y con el objeto de definir las zonas de plantaciones así como la adecuada distribución de las distintas especies vegetales en las bandas de ribera, se podría obtener el valor de los calados y las cotas de la lámina de agua a partir de simulaciones hidráulicas. De esta manera se optimizaría la distribución de las especies adecuándola a las necesidades de cada tramo en el que se intervenga

## REFERENCIAS

- Anstead, L., Boar, R.R., Tovey, N.K. 2012. The effectiveness of a soil bioengineering solution for river bank stabilisation during flood and drought conditions: two case studies from East Anglia. *Area*, 44, 479–488. <https://doi.org/10.1111/j.1475-4762.2012.01132.x>
- Benito, G., Beneyto, C., Aranda, J.Á., Machado, M.J., Francés, F., Moya, Y.S. 2022. Inundaciones y cambio climático: certezas e incertidumbres en el camino a la adaptación. *Cuadernos de Geografía de la Universitat de València*, 191. <https://doi.org/10.7203/CGUV.107.21424>
- Bladé, E., Cea, L., Corestein, G., Escolano, E., Puertas, J., Vázquez-Cendón, E., Dolz, J., Coll, A 2014. Iber: herramienta de simulación numérica del flujo en ríos. *Revista Internacional de Metodos Numericos para Calculo y Diseño en Ingenieria* 30:1–10. <https://doi.org/10.1016/j.rimni.2012.07.004>
- Caspeele, R., Taerwe, L., Frangopol, D.M. 2018. Life cycle analysis and assessment in civil engineering: towards an integrated vision. In: *Proceedings of the Sixth International Symposium on Life-Cycle Civil Engineering (IALCCE 2018)*. <https://doi.org/10.1201/9781315228914>

- CHC. 2016a. Real Decreto por el que se aprueba el Plan de Gestión de Inundaciones 2016-2021: Anejo 2, Descripción del Programa de Medidas. Demarcación Hidrográfica del Cantábrico Occidental. Boletín Oficial del Estado del 22 de enero de 2016, páginas 6093 a 6096. Madrid, España.
- CHC. 2016b. Real Decreto por el que se aprueba el Plan de Gestión de Inundaciones 2016-2021: Anejo 3. Justificación de las Medidas Estructurales del Plan de Gestión del Riesgo de Inundación. Boletín Oficial del Estado del 22 de enero de 2016, páginas 6093 a 6096, Madrid, España.
- CHC. 2023. Gestión del riesgo de inundación. <https://www.chcantabrico.es/gestion-cuencas/inundabilidad/evaluacion-gestion-riesgos-inundacion/proceso-elaboracion-mapas-peligrosidad-riesgo/primer-ciclo>. Consultada 29 Nov 2023
- CHC occidental. 2023. Real Decreto de Revisión y actualización del Plan de Gestión del Riesgo de Inundación, 2º ciclo. Demarcación Hidrográfica del Cantábrico Occidental. Boletín Oficial del Estado del 18 de enero de 2023, páginas 6774 a 6791. Madrid, España.
- CHC oriental. 2023a. Real Decreto de Revisión y actualización del Plan de gestión, 2º ciclo. Plan de Gestión del Riesgo de Inundación 2022-2027. Demarcación Hidrográfica del Cantábrico Oriental. Boletín Oficial del Estado del 22 de marzo de 2023, páginas 43114 a 43127. Madrid, España.
- CHC oriental 2023b. Real Decreto de Plan de Gestión del Riesgo de Inundación de la parte Española de la Demarcación Hidrográfica del Cantábrico Oriental. Boletín Oficial del Estado de 21 de marzo de 2023, páginas 43114 a 43127. Madrid, España.
- De Santoli, L., Astiaso-García, D., Violante, A.C. 2008. Planning of flood defence management and rehabilitation of the natural habitat in the downstream part of the river Tiber. In: *WIT Transactions on the Built Environment*. <https://doi.org/10.2495/GEO080031>
- Gómez, Á. 2021. Información de Prensa de AEMTE en Asturias: resumen del otoño de 2021 y avance del invierno de 2022.
- Hablamos Europa. 2023. Ley Europea de Restauración de la Naturaleza. <https://www.hablamosdeeuropa.es/es/Paginas/Noticias/Ley-Europea-de-Restauraci%C3%B3n-de-la-Naturaleza.aspx>. Consultada 25 Nov 2023
- Kurbanov, S., Sozaev, A., Shogenov, A., Karshiev, A. 2021. Bioengineering systems for protection and improvement of urbanized areas of coastal and recreational zones. *E3S Web of Conferences*, 262. <https://doi.org/10.1051/e3sconf/202126203021>
- Li, M-H., Eddleman, K.E. 2002. Biotechnical engineering as an alternative to traditional engineering methods. *Landsc Urban Plan*, 60, 225–242. [https://doi.org/10.1016/S0169-2046\(02\)00057-9](https://doi.org/10.1016/S0169-2046(02)00057-9)
- Maestre, R.G., Prieto, F. 2020. Las inundaciones en España: un problema que sube de nivel. *Boletín del Instituto Español de Estudios Estratégicos*, 19, 425-454.
- MITECO. 2023. Real Decreto 35/2023 por el que se aprueba la revisión de los planes hidrológicos de las demarcaciones hidrográficas del Cantábrico Occidental, Guadalquivir, Ceuta, Melilla, Segura y Júcar, y de la parte española de las demarcaciones hidrográficas. Boletín Oficial del Estado, 10 de febrero de 2023, páginas 19510 a 21315. Ministerio de Transición Ecológica, Madrid, España.
- MMA. 1998. Real Decreto 1664/1998 por el que se aprueban los Planes Hidrológicos de cuenca. Boletín Oficial del Estado, 11 de agosto de 1998, páginas 27296 a 27298. Ministerio de Medio Ambiente, Madrid, España.
- MOPU. 2016. Instrucción de Carreteras 5.2-IC Drenaje Superficial. Boletín Oficial del Estado, 15 de febrero de 2016, páginas 18882 a 19023. Ministerio de Obras Públicas y Urbanismo, Madrid, España.
- Mora-García, M.A., Domínguez-Cuesta, M.J., Valenzuela-Mendizábal, P. 2019. Inestabilidades de ladera provocadas por precipitaciones intensas: caso de estudio del 9 al 16 de junio de 2010 en Asturias. In: *Sexto Simposio Nacional de Predicción "Memorial Antonio Mestre."* Agencia Estatal de Meteorología, pp 659–666. <https://doi.org/10.31978/639-19-010-0.659>
- Rauch, H.P, von der Thannen, M., Raymond, P., *et al.*, 2022. Ecological challenges\* for the use of soil and water bioengineering techniques in river and coastal engineering projects. *Ecological Engineering*, 176, 106539. <https://doi.org/10.1016/j.ecoleng.2021.106539>



Rey, F., Bifulco, C., Bischetti, G. B., Bourrier, F., De Cesare, G., Florineth, F., ... & Stokes, A. 2019. Soil and water bioengineering: Practice and research needs for reconciling natural hazard control and ecological restoration. *Science of the Total Environment*, 648. <https://doi.org/10.1016/j.scitotenv.2018.08.217>

Ristic, R., Malosevic, D. 1997. Torrential floods - natural and man-made hazard. *Engineering geology and the environment Proc symposium, Athens*, 1997, vol. 1.

Romero-Fresneda, R., Moreno-García, J.V., Martínez-Núñez, L., Huarte-Ituláin, M.T., Rodríguez-Ballesteros, C., Botey, M.R. 2020. Comportamiento de las precipitaciones en España y Periodos de sequía (Periodo 1961-2018). Nota técnica 32 de AEMET. Agencia Estatal de Meteorología. <https://doi.org/10.31978/666-20-006-0>

Smith, A.B., Katz, R.W. 2013. US billion-dollar weather and climate disasters: Data sources, trends, accuracy and biases. *Natural Hazards*, 67. <https://doi.org/10.1007/s11069-013-0566-5>

Témez, P.J. 1992. Generalización y mejora del método racional. Versión de la Dirección General de Carreteras de España. *Revista Digital del Cedex*, (82), 51. Recuperado a partir de <https://ingenieriacivil.cedex.es/index.php/ingenieria-civil/article/view/833>
